# Supplementary material
Source: PubMed Central journal article supplement (PMC10043800)
Supplement: jamainternmed-e230258-s002.pdf [file jamainternmed-e230258-s002.pdf]

## Data Sharing Statement

Bosch. Comparative Effectiveness of Fludrocortisone and Hydrocortisone vs Hydrocortisone Alone Among Patients With Septic Shock. *JAMA Intern Med.* Published March 27, 2023. doi:10.1001/jamainternmed.2023.0258

### Data

**Data available:** No

### Additional Information

**Explanation for why data not available:** The data use agreement with Premier Inc. does not allow the Premier Healthcare Database used in this study to be made available publically. Those interested in accessing the Premier Healthcare Database can contact Premier Inc. directly.
